# Supplementary figures and images for: Differential analysis of prokaryotic communities from pristine mangrove tidal zone sediments reveal distinct structures and functional profiles
Source: Copernicus journal article supplement (doi:10.5194/bg-2020-181), 2020-07-08

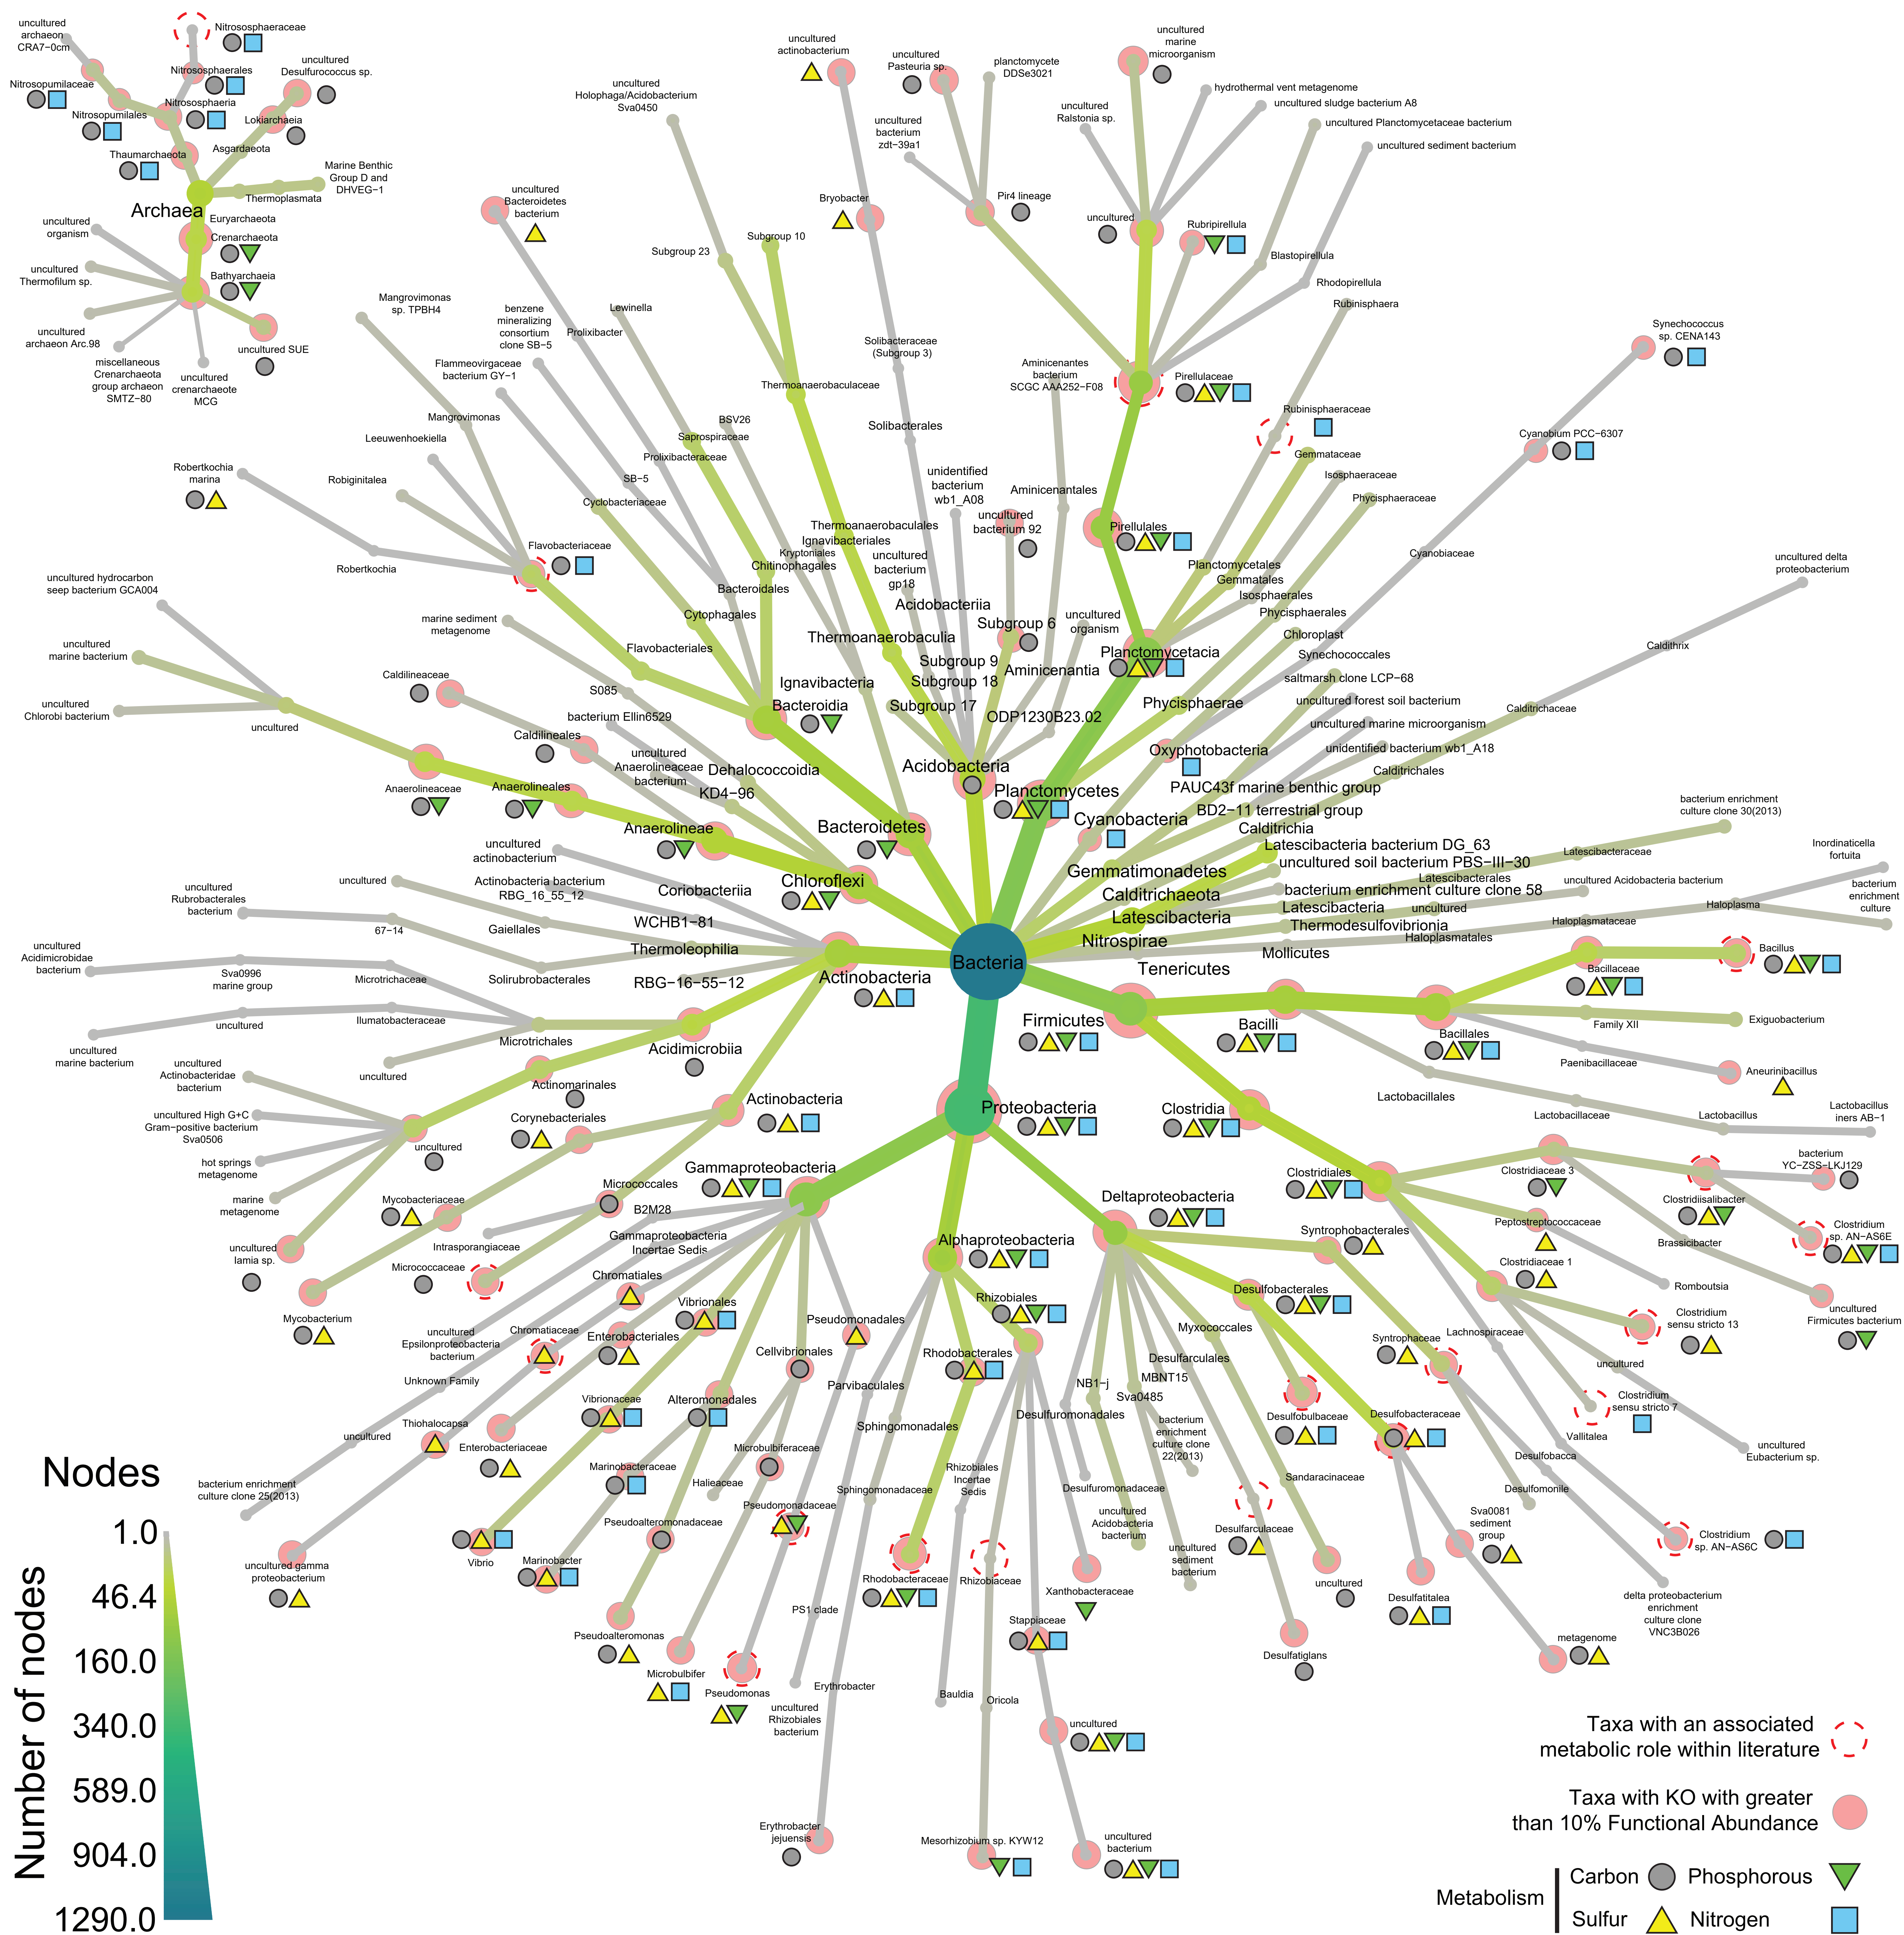

Supplement: Supplementary file 1 [file bg-2020-181-supplement.zip]
